# Supplementary material for: Gene Pathways That Delay Caenorhabditis elegans Reproductive Senescence
Source: PLOS journal article supplement (doi:10.1371/journal.pgen.1004752), 2014-12-04
Supplement: S1 (10.1371/journal.pgen.1004752.s001) [file journal.pgen.1004752.s001]

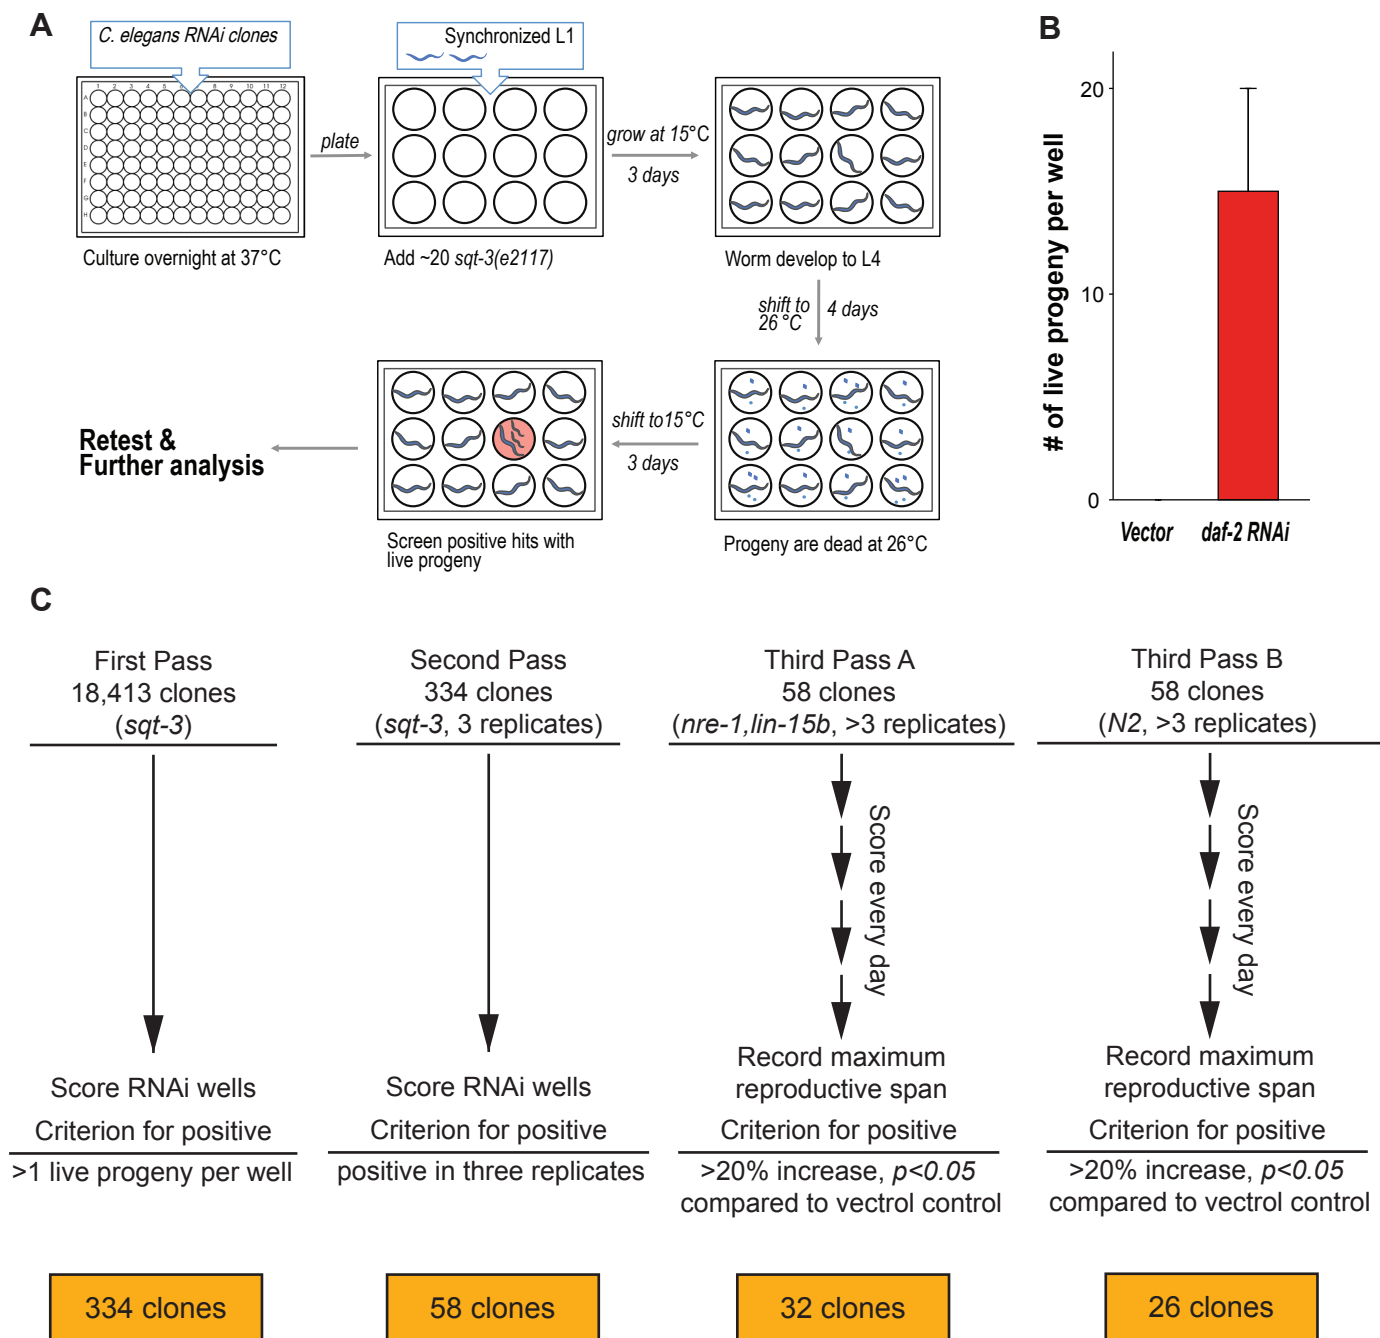

Figure S1 Wang et al
